# Supplementary material
Source: publisher site journal article supplement (https://www.dovepress.com/article/232795)
Supplement: Supplementary file 1 [file get_supplementary_file.php]

## Identify the best cut-off value for survival analysis

we identify the cut-off value for distinguishing between high and low expression using R language. Similar to the exhaustive algorithm, we set the proportion of the two groups: more than 30% but less than 70%. The value that could best reflect the discrepancy between the high-expression group and the low-expression group (with the smallest P-value) was identified as the best cut-off value. The detailed R codes are shown as below:

```
R soft version 3.5.1 (https://www.r-project.org/)
```

```
library(survival)
```

```
library(survminer)
```

```
res.cut <- surv_cutpoint(svdata, time = "futime",  
                        event = "fustat",  
                        variables = names(svdata)[3:ncol(svdata)],  
                        minprop = 0.3)
```

```
res.cat <- surv_categorize(res.cut)
```

```
my.surv <- Surv(res.cat$futime, res.cat$fustat)
```

```
pl <- list()
```

```
for (i in colnames(res.cat)[3:ncol(svdata)]) {
```

```
  group <- res.cat[,i]
```

```
  survival_dat <- data.frame(group = group)
```

```
  fit <- survfit(my.surv ~ group)
```

```
  group <- factor(group, levels = c("low", "high"))
```

```
  data.survdif <- survdiff(my.surv ~ group)
```

```
  p.val = 1 - pchisq(data.survdif$chisq, length(data.survdif$n) - 1)
```

```
  HR =
```

```
(data.survdif$obs[2]/data.survdif$exp[2])/(data.survdif$obs[1]/data.survdif$exp[1])
```

```
  up95 = exp(log(HR) +
```

```
  qnorm(0.975)*sqrt(1/data.survdif$exp[2]+1/data.survdif$exp[1]))
```

```
low95 = exp(log(HR) -  
qnorm(0.975)*sqrt(1/data.survdiff$exp[2]+1/data.survdiff$exp[1]))  
if (p.val>0.05) next  
HR <- paste("Hazard Ratio = ", round(HR,2), sep = "")  
CI <- paste("95% CI: ", paste(round(low95,2), round(up95,2), sep = " - "), sep = "")  
svsort <- svdata[order(svdata[,i]),]
```

Supplementary Figure 1: The expression levels of NF- $\kappa$ B signaling related proteins in Res186 or Res259 cells transfected with miR-138 mimics with or without IGF2BP2 overexpression plasmid were analyzed by western blot.

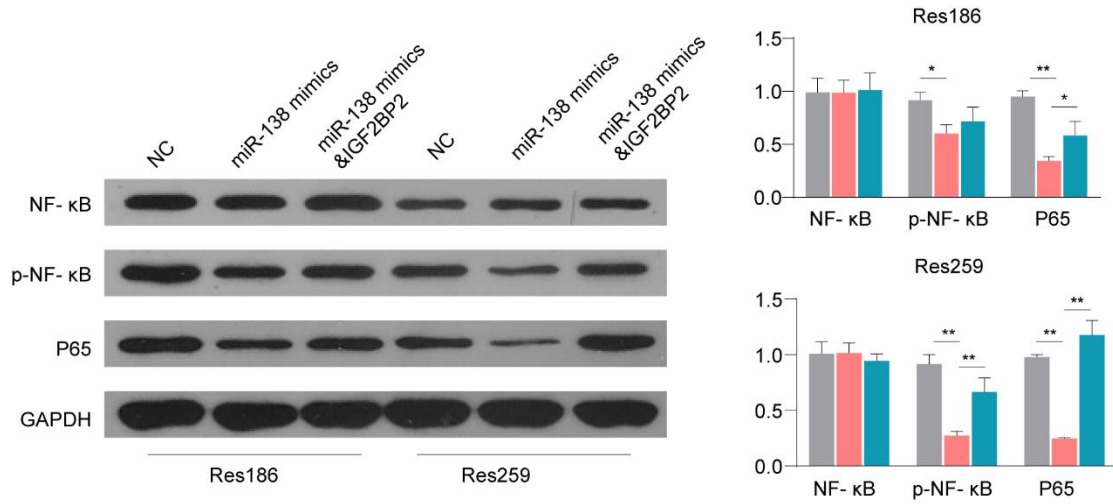

**Supplementary Table 1. Correlation of clinic-pathological features with miR-138 expression in LGG cohort**

| Variables       | Clinicopathological features | miR-138 expression     |                       | <i>P-value</i> |
|-----------------|------------------------------|------------------------|-----------------------|----------------|
|                 |                              | High expression (n=40) | Low expression (n=49) |                |
| Age (years)     | ≤45                          | 20(50.0)               | 18(36.7)              | 0.208          |
|                 | >45                          | 20(50.0)               | 31(63.3)              |                |
| Gender          | Male                         | 22(55.0)               | 28(57.1)              | 0.890          |
|                 | Female                       | 18(45.0)               | 21(42.9)              |                |
| WHO grade       | I                            | 30(75.0)               | 22(44.9)              | <b>0.004</b>   |
|                 | II                           | 10(25.0)               | 27(55.1)              |                |
| Metastasis      | No                           | 31(78.0)               | 27(55.1)              | <b>0.027</b>   |
|                 | Yes                          | 9(22.0)                | 22(44.9)              |                |
| Survival status | Dead                         | 9(22.0)                | 21(47.7)              | <b>0.016</b>   |
|                 | Living                       | 31(78.0)               | 23(52.3)              |                |

Bold values indicate statistical significance,  $P < 0.05$

**Supplementary Table 2. Univariate and multivariate Cox proportional hazard analyses for overall survival and recurrence-free survival.**

|                                                                                                | Univariate analysis |             |                | Multivariate analysis |             |                |
|------------------------------------------------------------------------------------------------|---------------------|-------------|----------------|-----------------------|-------------|----------------|
|                                                                                                | HR                  | 95% CI      | <i>P</i> value | HR                    | 95% CI      | <i>P</i> value |
| <b>Univariate and multivariate analysis of recurrence-free survival in LGG patients (n=89)</b> |                     |             |                |                       |             |                |
| Age                                                                                            | 1.125               | 0.625–1.720 | 0.589          |                       |             |                |
| Gender                                                                                         | 0.984               | 0.646-1.219 | 0.842          |                       |             |                |
| WHO grade                                                                                      | 2.341               | 1.871-2.749 | <b>0.015</b>   | 1.922                 | 1.504-2.495 | <b>0.025</b>   |
| Metastasis                                                                                     | 1.847               | 1.421-2.473 | <b>0.031</b>   | 1.711                 | 1.485-2.218 | <b>0.032</b>   |
| miR-138 expression                                                                             | 1.618               | 1.351-1.942 | <b>0.044</b>   | 1.520                 | 1.274-1.822 | <b>0.039</b>   |
| <b>Univariate and multivariate analysis of recurrence-free survival in LGG patients (n=89)</b> |                     |             |                |                       |             |                |
| Age                                                                                            | 1.126               | 0.745-1.361 | 0.884          |                       |             |                |
| Gender                                                                                         | 0.853               | 0.624-1.221 | 0.647          |                       |             |                |
| WHO grade                                                                                      | 2.689               | 1.989-3.271 | <b>0.026</b>   | 2.552                 | 1.812-2.942 | <b>0.022</b>   |
| Metastasis                                                                                     | 1.958               | 1.671-2.704 | <b>0.032</b>   | 1.822                 | 1.509-2.219 | <b>0.039</b>   |
| miR-138 expression                                                                             | 2.034               | 1.817-2.626 | <b>0.038</b>   | 2.114                 | 1.805-3.022 | <b>0.019</b>   |

Bold values indicate statistical significance,  $P < 0.05$
